# Supplementary material
Source: ML conference proceedings conference paper supplement (https://openaccess.thecvf.com/content/ICCV2023/html/Wu_OnlineRefer_A_Simple_ICCV_2023_paper.html)
Supplement: Supplementary file 1 [file Wu_OnlineRefer_A_Simple_ICCV_2023_supplemental.pdf]

# OnlineRefer: A Simple Online Baseline for Referring Video Object Segmentation

## Supplementary Material

Dongming Wu<sup>1‡</sup>, Tiancai Wang<sup>2</sup>, Yuang Zhang<sup>3</sup>, Xiangyu Zhang<sup>2,4</sup>, Jianbing Shen<sup>5†</sup>  
<sup>1</sup> Beijing Institute of Technology, <sup>2</sup> MEGVII Technology, <sup>3</sup> Shanghai Jiao Tong University,  
<sup>4</sup> Beijing Academy of Artificial Intelligence, <sup>5</sup> SKL-IOTSC, CIS, University of Macau

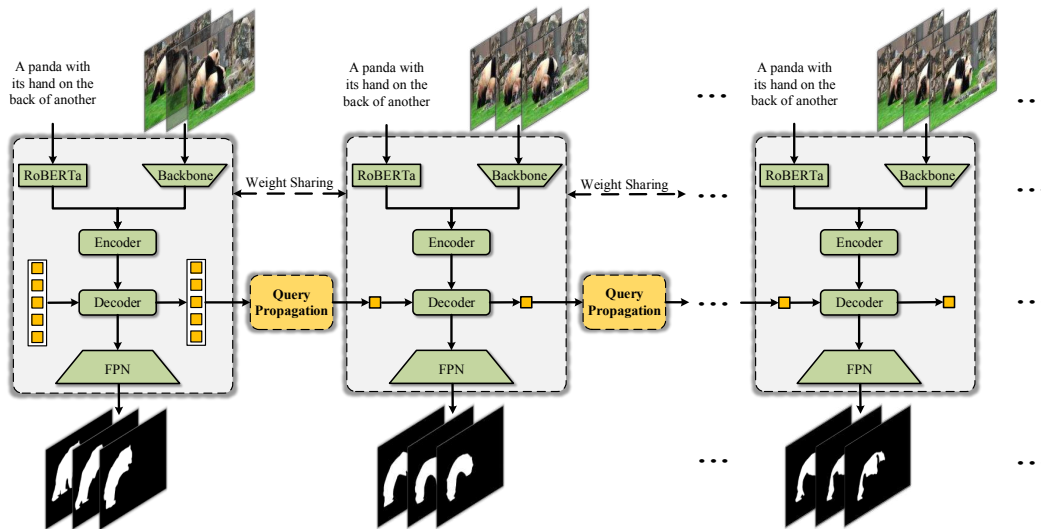

Figure 1: Pipeline of semi-online model of OnlineRefer, which associates the same referent object across different clips.

### 1. Semi-Online Model

We present more semi-online framework details of OnlineRefer in Fig. 1. Unlike the online model that follows a frame-by-frame pattern, the semi-online model propagates the target query across clips. Note that we use sharing query for multi-frame referring segmentation within each clip.

### 2. Additional Experiment Details

**Refer-Youtube-VOS** provides full-video expression by describing an entire video and first-frame expression based on the first frame, while we only use their full-video expression for training and validation.

**Refer-DAVIS<sub>17</sub>** also contains the full-video and first-frame expressions, which are developed by four annotators. Our final  $\mathcal{J}\&\mathcal{F}$  scores are averaged from the four results.

### 3. Additional Ablation Study

We provide a thorough analysis of sampling length settings in Table 1. It is obvious that increasing frames from 2 to 3 brings performance improvement on ResNet-50, while it fails on Swin-L. When using the progressive sampling

strategy (*i.e.*, [2, 3]), the best results can be obtained on both two backbones. This indicates that the appropriate increment on sampling lengths is beneficial for guaranteeing model stability and improving model performance.

| Sampling Lengths | ResNet-50                  |               |               | Swin-L                     |               |               |
|------------------|----------------------------|---------------|---------------|----------------------------|---------------|---------------|
|                  | $\mathcal{J}\&\mathcal{F}$ | $\mathcal{J}$ | $\mathcal{F}$ | $\mathcal{J}\&\mathcal{F}$ | $\mathcal{J}$ | $\mathcal{F}$ |
| [2]              | 56.5                       | 55.1          | 57.9          | 62.7                       | 60.8          | 64.5          |
| [3]              | 56.7                       | 55.2          | 58.2          | /                          | /             | /             |
| [2, 3]           | <b>57.3</b>                | <b>55.8</b>   | <b>58.8</b>   | <b>63.5</b>                | <b>61.6</b>   | <b>65.5</b>   |
| [2, 3, 4]        | 57.0                       | 55.5          | 58.4          | 63.1                       | 61.1          | 65.1          |

Table 1: The effect of sampling lengths on Refer-Youtube-VOS. ‘/’ means no results due to model divergence.

### 4. More Qualitative Results

Fig. 2 offers some qualitative comparison between the offline method ReferFormer [1] and our OnlineRefer. We can see that OnlineRefer performs better than ReferFormer under the situations of object occlusion and visually-similar background, approving the superiority of query propagation. Fig. 3 also shows OnlineRefer can deal well with other challenging situations, like size and appearance variation, small or missing objects, moving objects, *etc.*

Expression: a knife is in the hand of a person

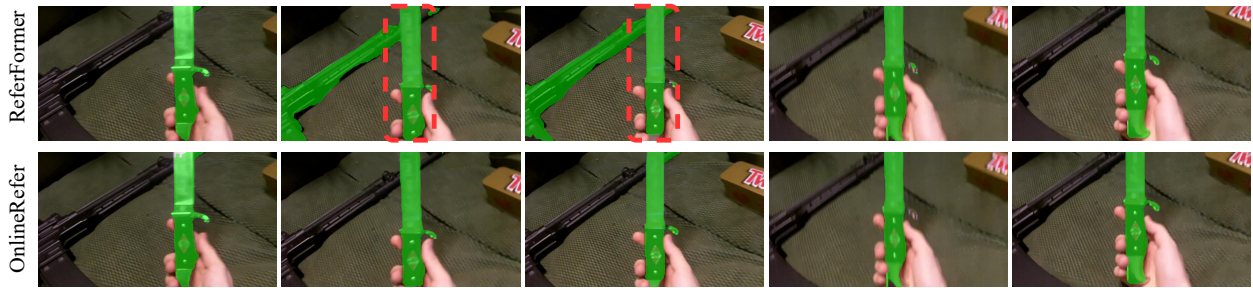

Expression: the black and white zebra is on the left in the grass with its head down

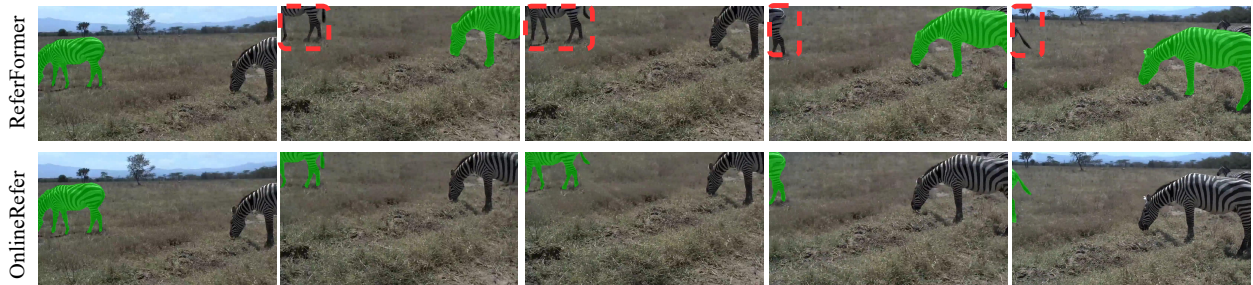

Expression: a person in a blue shirt and black shorts

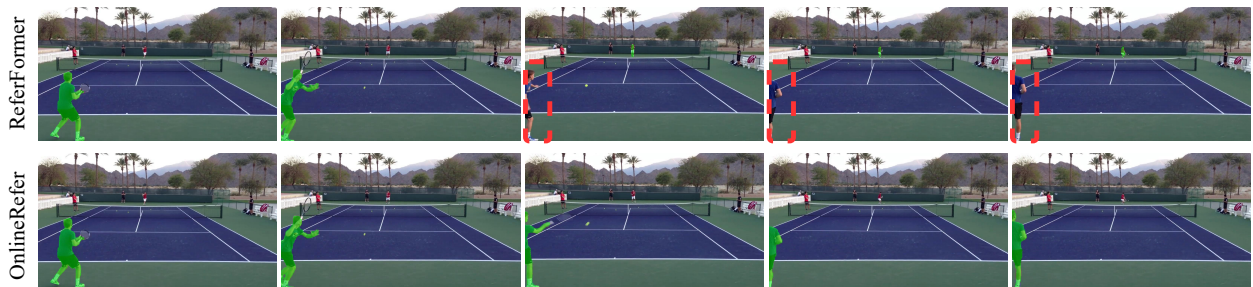

Expression: a red cloth being held by a person wearing black pants

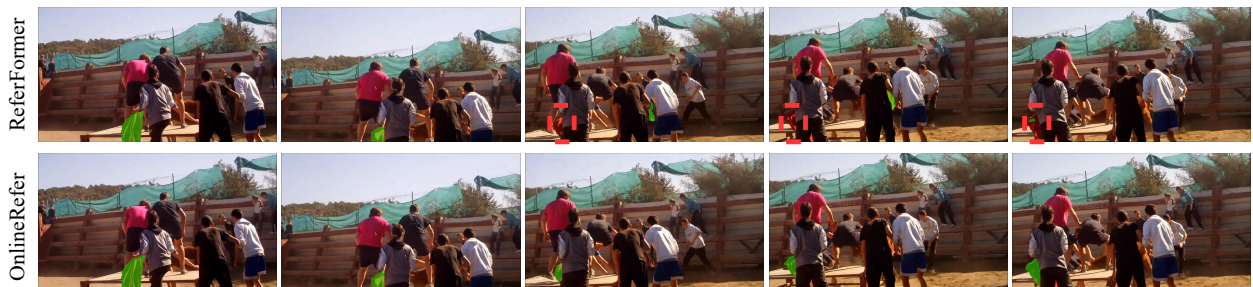

Expression: a hedgehog next to a purple igloo

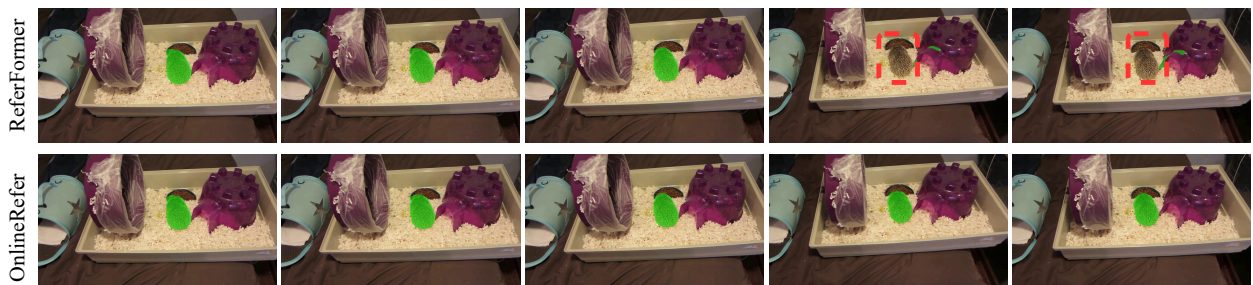

Figure 2: Comparison between ReferFormer and OnlineRefer on Refer-Youtube-VOS.

Expression: a man behind another man in a harness

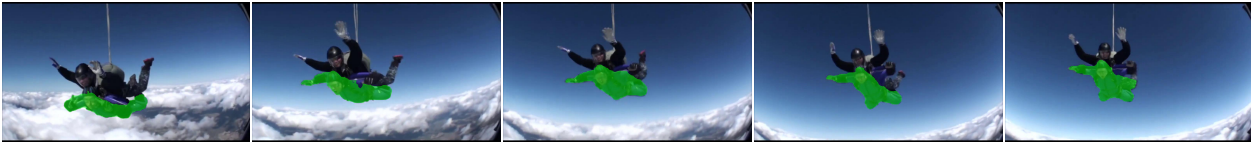

Expression: a large train racing down the tracks

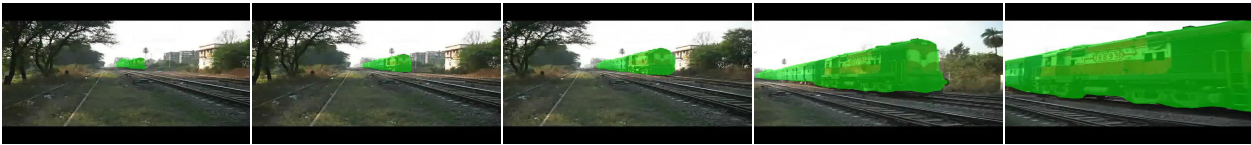

Expression: a tennis racket on the left being held by a person

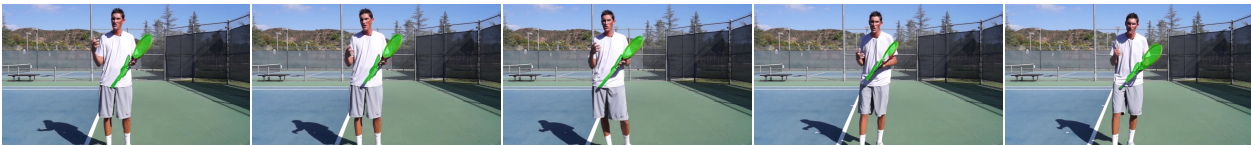

Expression: a small fox like dog on the right side of a sofa

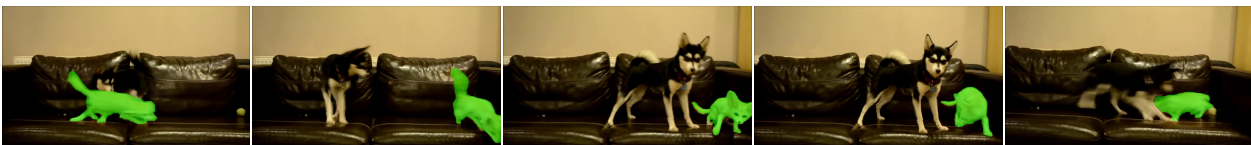

Expression: the second giraffe from the right

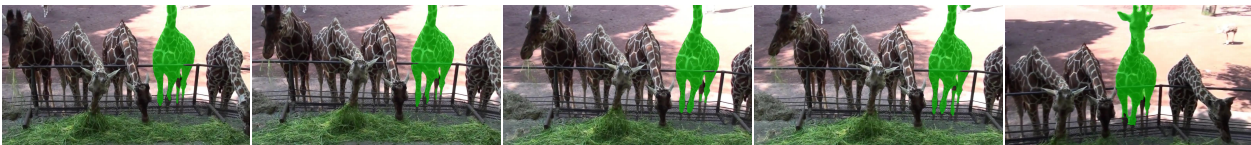

Expression: a person on the far side of a tennis court serving a tennis ball

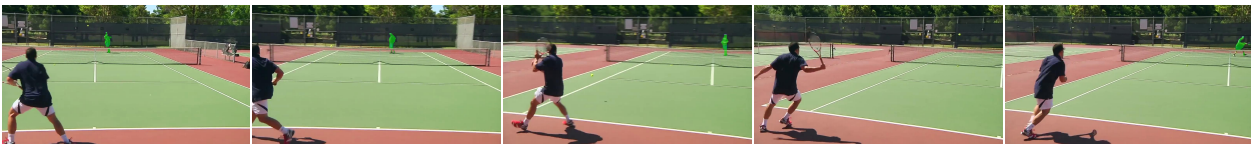

Expression: the palm of a person carrying a mouse

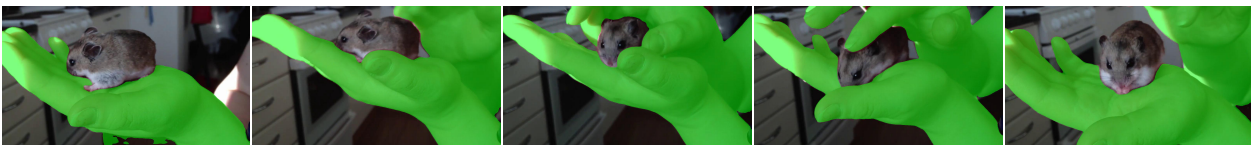

Expression: a black cat in the middle of the view

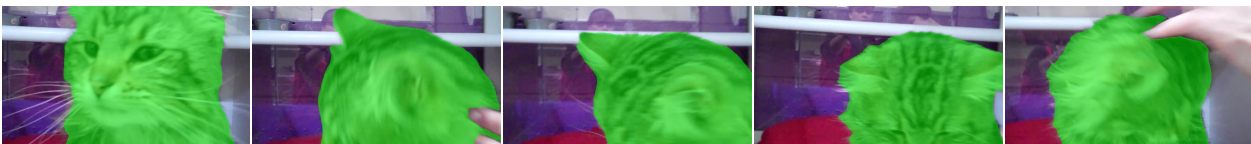

Figure 3: **More qualitative results** of our OnlineRefer on Refer-Youtube-VOS.

## References

- [1] Jiannan Wu, Yi Jiang, Peize Sun, Zehuan Yuan, and Ping Luo. Language as queries for referring video object segmentation.

In *CVPR*, 2022.
